# Supplementary material for: Mining the Plasma Cell Transcriptome for Novel Cell Surface Proteins
Source: MDPI journal article supplement (doi:10.3390/ijms19082161), 2018-07-24
Supplement: s1 [file s1]

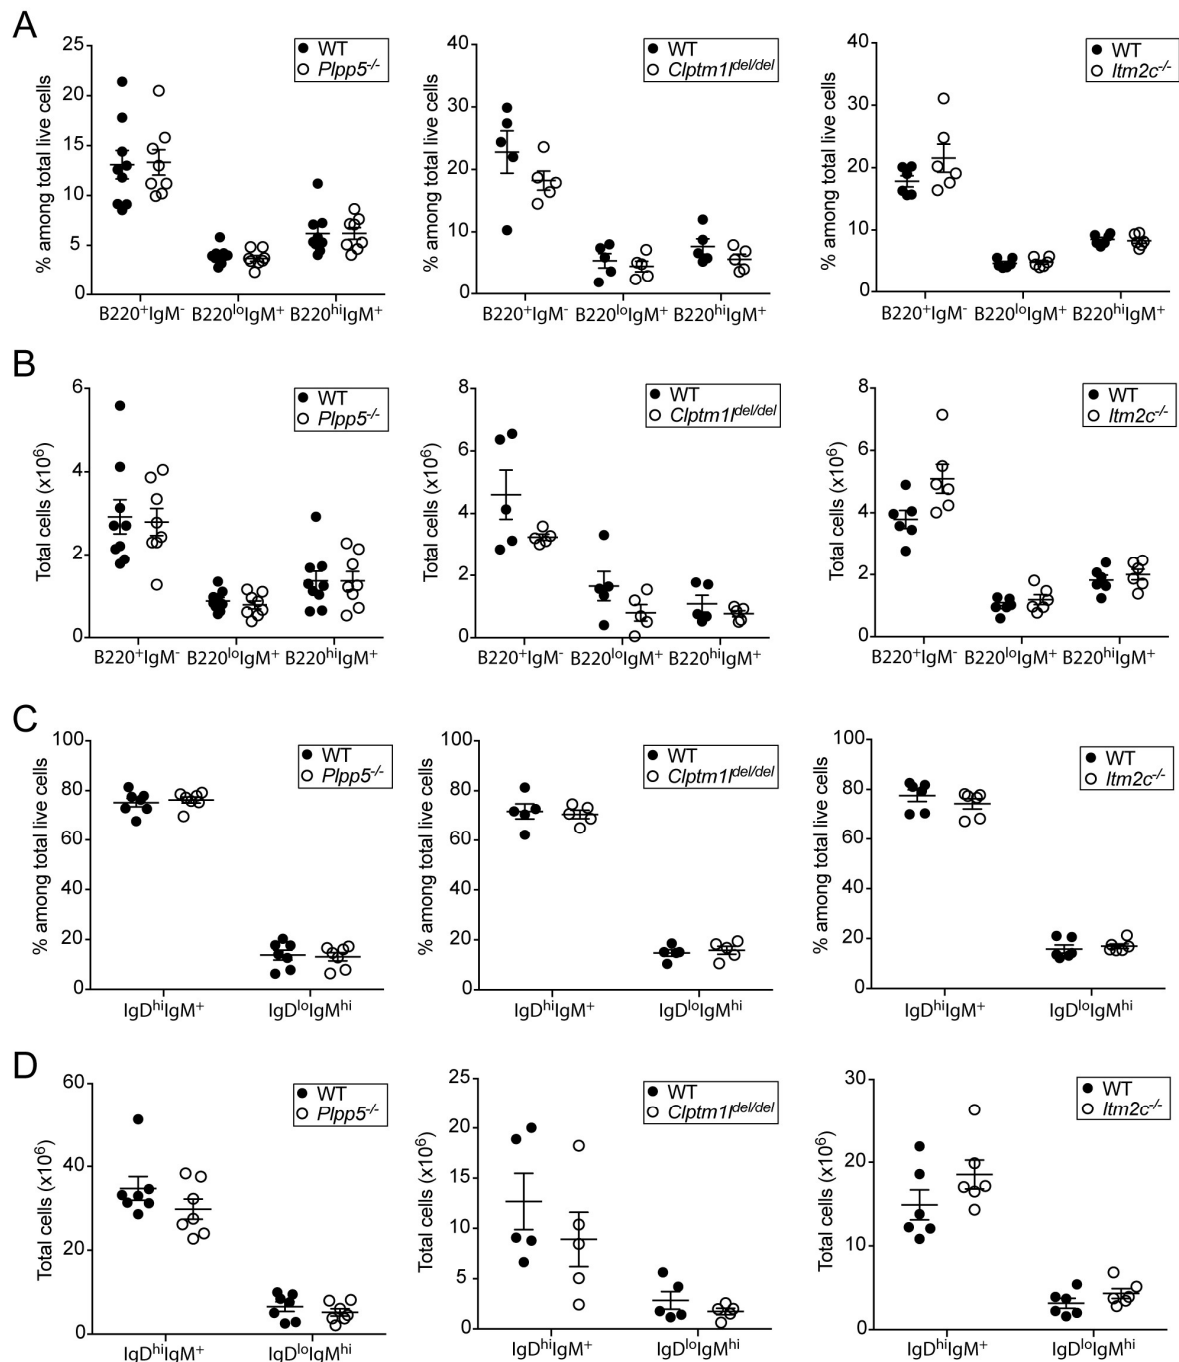

**Supplementary Figure 1.** *Plpp5*<sup>-/-</sup>, *Clptm1*<sup>del/del</sup> and *Itm2c*<sup>-/-</sup> mice have normal B cell development and maturation. (A) Frequency and; (B) Number of precursor (B220<sup>+</sup>IgM<sup>-</sup>), immature (B220<sup>lo</sup>IgM<sup>+</sup>) and recirculating (B220<sup>hi</sup>IgM<sup>+</sup>) B cells in the bone marrow of *Plpp5*<sup>-/-</sup>, *Clptm1*<sup>del/del</sup>, *Itm2c*<sup>-/-</sup> and age-matched WT mice. (C) Frequency and; (D) Number of mature (IgD<sup>hi</sup>IgM<sup>+</sup>) and immature (IgD<sup>lo</sup>IgM<sup>hi</sup>) B cells in the spleen of *Plpp5*<sup>-/-</sup>, *Clptm1*<sup>del/del</sup>, *Itm2c*<sup>-/-</sup> and age-matched WT mice. Results are combined from 2 (*Clptm1*) or 3 (*Plpp5*, *Itm2c*) independent experiments. Horizontal line shows the mean ± SEM. Each dot represents an individual mouse.

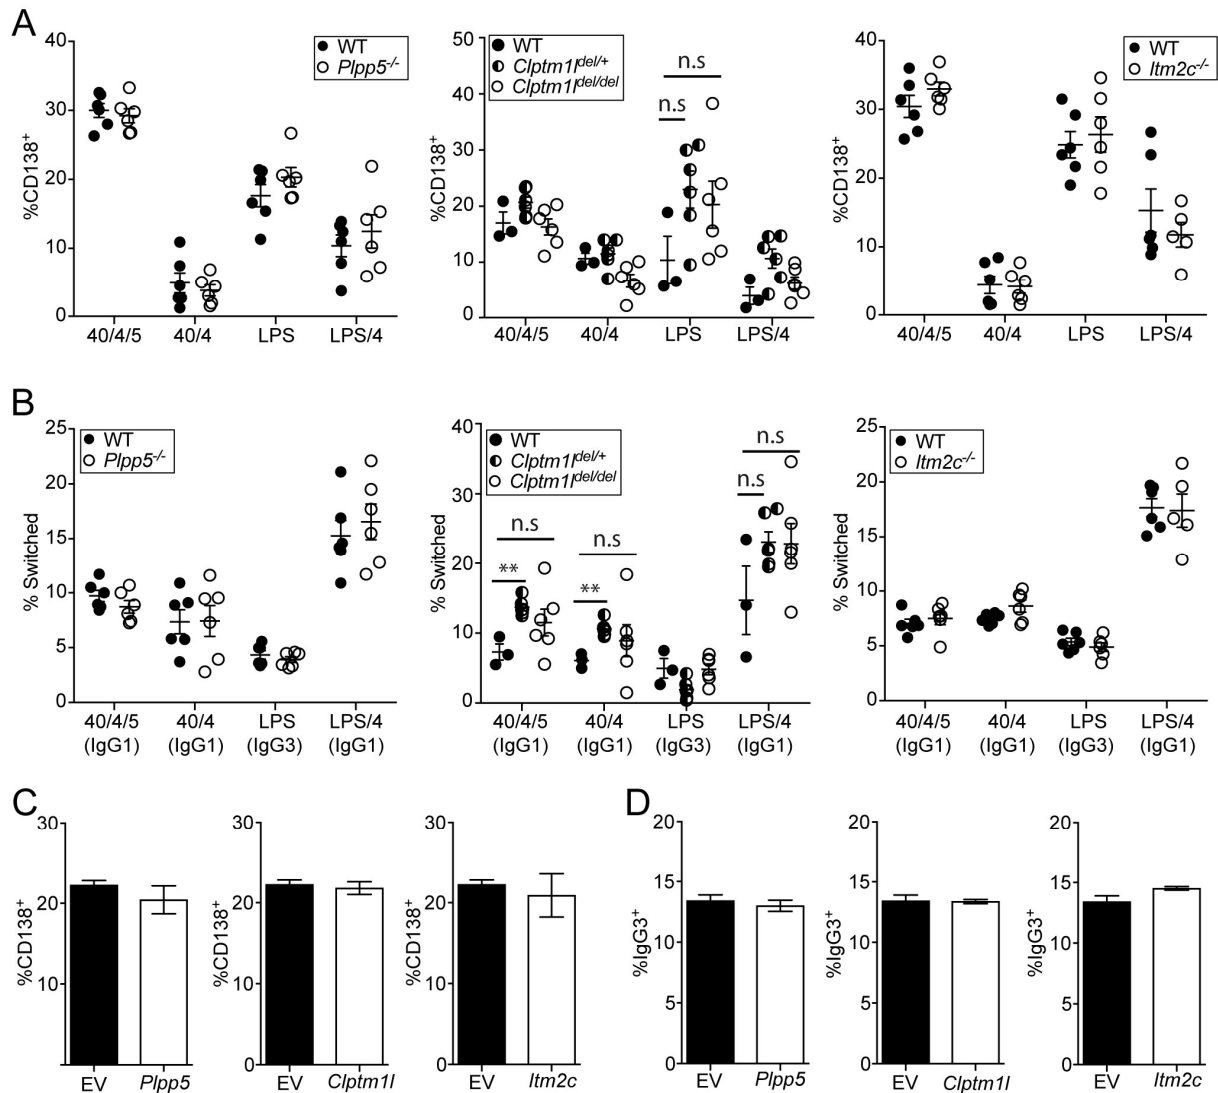

**Supplementary Figure 2.** *Plpp5*<sup>-/-</sup>, *Clptm1*<sup>del/del</sup> and *Itm2c*<sup>-/-</sup> B cells respond normally to *in vitro* stimulation. **(A-B)** Naïve splenic B cells were isolated from *Plpp5*<sup>-/-</sup>, *Clptm1*<sup>del/+</sup>, *Clptm1*<sup>del/del</sup>, *Itm2c*<sup>-/-</sup> and age-matched WT mice and cultured for 4 days in CD40L, IL-4, IL-5 (40/4/5), CD40L, IL-4 (40/4), LPS or LPS/IL-4 (LPS/4) before analysis by flow cytometry. The proportion of B cells that had undergone **(A)** differentiation to ASCs (CD138<sup>+</sup>) or **(B)** Immunoglobulin class-switch recombination is shown. Each dot represents an individual mouse. **(C-D)** Naïve splenic B cells were isolated and stimulated for 24 hours with LPS before retroviral transduction with full length *Plpp5*, *Clptm1l*, *Itm2c* or empty vector (EV) control. After a further 3 days of LPS stimulation, cells were analyzed by flow cytometry for the proportion of transduced (GFP<sup>+</sup>) cells that had undergone **(C)** ASC differentiation (CD138<sup>+</sup>) and **(D)** Immunoglobulin class-switch recombination. Results are the mean  $\pm$  SEM from 2 independent experiments. Statistical significance was analyzed using unpaired t-test, correcting for multiple comparisons. \*\* P<0.01 for the indicated comparison. n.s, not significant (P>0.05).
